# Supplementary material
Source: Springer Nature journal article supplement (https://www.springermedizin.de/resource/supplementary/13069_2008_5_MOESM4_ESM.pdf/9659588)
Supplement: MOESM4 [file 9659588]

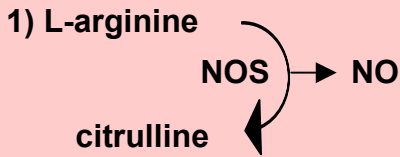

eNOS (endothelial NOS)  
 iNOS (inducible NOS)  
 nNOS (neuronal NOS)

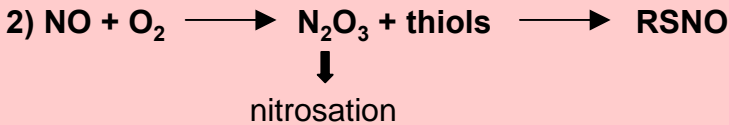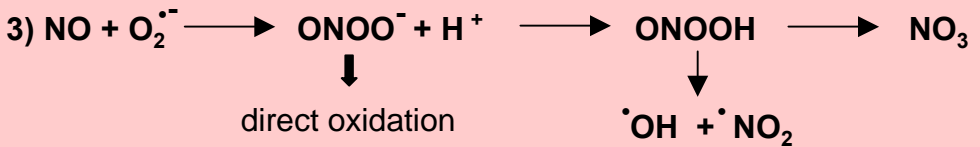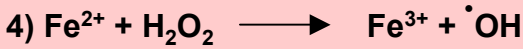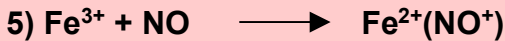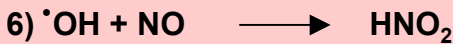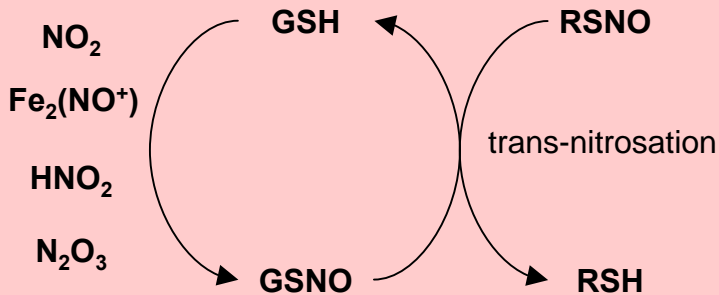

NO<sup>+</sup> carriers  
 (nitrosating species)
